# Supplementary material
Source: ML conference proceedings conference paper supplement (https://openaccess.thecvf.com/content/WACV2023/html/Pal_MORGAN_Meta-Learning-Based_Few-Shot_WACV_2023_paper.html)
Supplement: Supplementary file 1 [file Pal_MORGAN_Meta-Learning-Based_Few-Shot_WACV_2023_supplemental.pdf]

# MORGAN: Meta-Learning-based Few-Shot Open-Set Recognition via Generative Adversarial Network

## Supplementary Material

Debabrata Pal<sup>1,2</sup>, Shirsha Bose<sup>3</sup>, Biplab Banerjee<sup>1</sup>, Yogananda Jeppu<sup>2</sup>

<sup>1</sup>Indian Institute of Technology, Bombay, <sup>2</sup>Honeywell Technology Solutions, India,

<sup>3</sup>Technical University of Munich, Germany

{deba.iitbcsre19, shirshabosecs, getbiplab, yvjjeppu}@gmail.com

### 1. Notation table and associated descriptions

Table 1. Notation Table

| Notations                                                    | Descriptions                                                                        |
|--------------------------------------------------------------|-------------------------------------------------------------------------------------|
| <b>Input data and processed features</b>                     |                                                                                     |
| $H, W, B$                                                    | Height, width and spectral bands of input 3D HSI patches                            |
| $x^s, y^s; S, S_f$                                           | Support sample and label, Support set and its features                              |
| $S^k$                                                        | Support set of $k^{th}$ known class                                                 |
| $x^q, y^q; Q, Q_f$                                           | Query sample and label, Query set and its features                                  |
| $Q_{aug}$                                                    | Unknown query features with <i>pseudo-unknown</i> samples                           |
| $Q_{dist}$                                                   | Euclidean distance of each query from the prototypes                                |
| $K, \mathcal{U}$                                             | Number of <i>known</i> and <i>pseudo-unknown</i> classes in an episode              |
| $m, N$                                                       | Number of support, queries per class for training in an episode                     |
| $s_l, s_h$                                                   | <i>Pseudo-known, unknown</i> samples generated in adversarial optimization          |
| $\mathcal{P}, \mathcal{P}_k$                                 | <i>Known</i> prototype set, prototype for single <i>known</i> class                 |
| $\mathcal{P}_y, \mathcal{P}_d$                               | True prototype of a query, prototype for open-space                                 |
| $z_l, z_h$                                                   | Noise vectors for generating <i>pseudo-known, unknown</i> samples                   |
| $\mathcal{N}(0, \sigma)$                                     | General isotropic Gaussian with mean=0, standard deviation $\sigma$                 |
| $\sigma_L, \sigma_H$                                         | Standard deviations for generating <i>pseudo-known, unknown</i> samples             |
| <b>Network components and associated hyperparameters</b>     |                                                                                     |
| $f_\phi, \mathcal{O}_\epsilon$                               | Feature extractor, outlier detector                                                 |
| $G_{\mathcal{H}\theta}, D_{\mathcal{H}\phi}$                 | <i>Pseudo-unknown</i> sample generator and discriminator                            |
| $\tilde{G}_{\mathcal{H}\theta}, \tilde{D}_{\mathcal{H}\phi}$ | Clone copy of $G_{\mathcal{H}\theta}, D_{\mathcal{H}\phi}$                          |
| $\nabla GH, \nabla DH$                                       | Gradients for <i>pseudo-unknown</i> sample generator and discriminator              |
| $G_{\mathcal{L}\theta}, D_{\mathcal{L}\phi}$                 | <i>Pseudo-known</i> sample generator and discriminator                              |
| $\tilde{G}_{\mathcal{L}\theta}, \tilde{D}_{\mathcal{L}\phi}$ | Clone copy of $G_{\mathcal{L}\theta}, D_{\mathcal{L}\phi}$                          |
| $\nabla GL, \nabla DL$                                       | Gradients for <i>pseudo-known</i> sample generator and discriminator                |
| $\beta_L, \beta_H$                                           | Learning rates for updating original GAN networks                                   |
| $\alpha_L, \alpha_H$                                         | Learning rates for updating cloned GAN networks                                     |
| $\mathcal{I}_o, \mathcal{I}_i$                               | Iterations to update cloned GAN network parameters                                  |
| $\tau$                                                       | Range of sampled episodes                                                           |
| <b>Distance, loss functions and regularizer</b>              |                                                                                     |
| $d$                                                          | Euclidean distance                                                                  |
| $\mathcal{L}_l, \mathcal{L}_h$                               | Adversarial losses for generating <i>pseudo-known</i> and <i>unknown</i> samples    |
| $\mathcal{L}_{Kc}$                                           | Compaction loss to increase <i>known</i> class data density                         |
| $\mathcal{L}_{Os}$                                           | Outlier scattering loss to increase separation from closed-boundary                 |
| $\gamma$                                                     | Hyperparameter (positive) to weight the distance of an outlier from $\mathcal{P}_y$ |
| $\mathcal{L}_{Oc}$                                           | Outlier calibration loss for outlier detector                                       |
| $\mathcal{L}_{FE}$                                           | Loss for feature extractor                                                          |
| $\lambda_{AOL}$                                              | Anti-overlap latent regularizer                                                     |
| $\epsilon$                                                   | Small positive constant to ensure $\lambda_{AOL} \geq 0$                            |

### 2. Analysis of AOL regularizer

In MORGAN, two noise vectors  $z_l$  and  $z_h$  are sampled from isotropic gaussian distribution with varying standard deviations,  $[\mathcal{N}(0, \sigma_L)]$  and  $[\mathcal{N}(0, \sigma_H)]$ , respectively, where  $\sigma_L < \sigma_H$ . The angular difference ( $\theta$ ) or similarity between  $z_l$  and  $z_h$  impacts the metric distance between the generated *pseudo known*  $s_l$  and *unknown*  $s_h$  samples. Mathematically,  $\theta$  controls the range of the  $\lambda_{AOL}$  regularizer to penalize *pseudo-unknown* generator  $G_{\mathcal{H}\theta}$  in producing non-overlapping pseudo outliers and is shown in Fig 1.

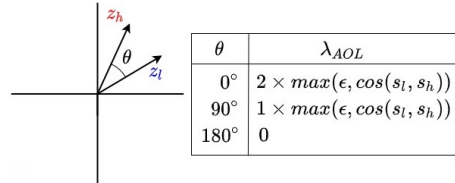

Figure 1. The angular difference between two noise vectors,  $z_l$  and  $z_h$ , determines the Anti-overlap regularizer's value

We define the AOL regularization term in (1) and explain the following scenarios based on the value of  $\theta$ .

$$\lambda_{AOL} = (1 + \cos(z_l, z_h)) \cdot \max(\epsilon, \cos(s_l, s_h)) \quad (1)$$

Where  $\cos(i, j) = \frac{i \cdot j}{\|i\|_2 \|j\|_2}$  represents cosine similarity between vectors  $i, j$  and  $\epsilon$  is small positive constant (0.00001).  $\epsilon$  helps to prevent  $\lambda_{AOL}$  to become negative.

**Case-1**  $\{\theta = 0^\circ\}$ : The role of the  $\lambda_{AOL}$  regularizer is to penalize the *pseudo-unknown* generative network ( $G_{\mathcal{H}\theta}$ ) heavily when the feature representation of  $s_h$  becomes equivalent to that of  $s_l$  produced by the *pseudo-known* generative network  $G_{\mathcal{L}\theta}$ . If the cosine similarity of two noise vectors,  $z_l$  and  $z_h$  is very high, the generated adversarial samples can have identical feature representation or reside very closely in the metric space. Then, the sole purpose of using a  $G_{\mathcal{H}\theta}$  to generate  $s_h$  is lost. Due to high similarity between  $z_l$  and  $z_h$ ,  $\cos(z_l, z_h)$  becomes one and it makes  $\lambda_{AOL}$  to have a value of  $2 \times \max(\epsilon, \cos(s_l, s_h))$ . Further, if the generated samples are highly similar,  $\lambda_{AOL}$  becomes two as  $\cos(s_l, s_h)$  is one. This value is added with the loss objective,  $\mathcal{L}_h$ , to penalize the  $G_{\mathcal{H}\theta}$ .

**Case-2**  $\{\theta = 90^\circ\}$ : Similarly, for low similarity between  $z_l$  and  $z_h$  or angle between  $z_l, z_h$  is  $90^\circ$ ,  $\cos(z_l, z_h)$  becomes zero and it makes  $\lambda_{AOL}$  to have a value of  $1 \times \max(\epsilon, \cos(s_l, s_h))$ . However, If the generated samples are still highly similar,  $\lambda_{AOL}$  becomes one as  $\cos(s_l, s_h)$  is one. It is added with the loss objective,  $\mathcal{L}_h$ , to penalize the  $G_{\mathcal{H}\theta}$ .

**Case-2**  $\{\theta = 180^\circ\}$ : In case  $z_l$  and  $z_h$  are sampled from

Table 2. 5-shot FSOSR performance comparison using the proposed outlier scattering loss and the reciprocal loss for four HSI datasets

| Reciprocal loss        | Indian Pines |            |            | Pavia University |            |            | Salinas    |            |            | Houston-2013 |            |            |
|------------------------|--------------|------------|------------|------------------|------------|------------|------------|------------|------------|--------------|------------|------------|
|                        | ClosedOA     | OpenOA     | AUROC      | ClosedOA         | OpenOA     | AUROC      | ClosedOA   | OpenOA     | AUROC      | ClosedOA     | OpenOA     | AUROC      |
| Reciprocal Loss [2]    | 93.21±0.14   | 82.49±0.08 | 81.59±0.12 | 80.54±0.16       | 80.81±0.21 | 82.62±0.09 | 84.33±0.17 | 85.50±0.14 | 89.52±0.12 | 81.71±0.22   | 83.55±0.15 | 85.49±0.12 |
| Scattering Loss (Ours) | 95.09±0.18   | 90.43±0.24 | 95.59±0.12 | 81.11±0.19       | 92.18±0.18 | 92.98±0.14 | 86.64±0.09 | 93.70±0.11 | 94.99±0.11 | 83.64±0.21   | 92.18±0.14 | 95.17±0.16 |

quite separated data points in the gaussian distribution, or  $(\sigma H - \sigma L)$  is relatively high,  $\theta$  can be considered as  $180^\circ$ . Intuitively, it creates the feature representations of  $s_l$  and  $s_h$  completely different. Also,  $\lambda_{AOL}$  becomes zero as  $\cos(z_l, z_h)$  is -1. No further penalization happened on *pseudo-unknown* generator, optimized for  $\mathcal{L}_h$ .

**Case-3**  $\{\theta = others\}$ : For any other angle between the 0, and 180 degrees, the value of the  $\lambda_{AOL}$  regularizer is determined as per (1) and is used to penalize the *pseudo-unknown* generative network.

Thus the angle between the  $z_l$  and  $z_h$  vectors determines how much the  $\lambda_{AOL}$  regularizer will penalize the *pseudo-unknown* generator for generating adversarial outliers so that they can be dissimilar to the *pseudo-known* samples.

### 3. Analysis on Outlier Scattering Loss

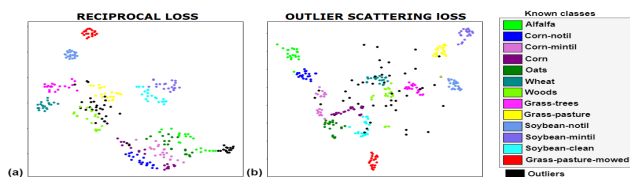

Figure 2. t-SNE visualization of the metric space due to optimization using (a) Reciprocal Points classification loss [2] (b) our Outlier Scattering Loss over Indian Pines dataset

Our Outlier Scattering Loss is philosophically similar to the reciprocal points classification loss [3], where the reciprocal relation ensures that the higher the distance of an unknown query  $\in Q_{aug}$  from a *known* class true prototype  $\mathcal{P}_y$ , the lesser the probability of that query belonging to that *known* class. The reciprocal points [2] are external learnable parameters representing the extra-class space information of each *known* class. Minimizing the reciprocal points classification loss, a query is classified as *known* or *unknown* based on the otherness with reciprocal points. During reciprocal points optimization, the *known* classes are spread towards the feature space periphery, limiting the *unknown* samples in a bounded open space. However, in multi-class classification, reciprocal points repel the outliers and creates a fixed cluster in open-space closer to the closed-set distribution reducing separation margin and lag transferable knowledge over the meta-learning episodes. Hence, unlike [2], we pull these outliers towards an open-space prototype to learn transferable knowledge over the episodes and maximize the separation margin from closed-set. Also, reciprocal points do not help feature extractor to extract suitable support and query features in metric learning. In contrast, we compute the Outlier Scattering Loss on the set of *known* class prototypes  $\mathcal{P}$  and the prototype representing the open

space,  $\mathcal{P}_U$ . When multiple *known* class and open set samples come in interaction, the fine-grained outliers are scattered in open space and pulled towards  $\mathcal{P}_U$ , increasing the margin from the closed boundaries. Combined with compaction loss and outlier calibration loss, the Outlier Scattering Loss is also used to optimize the feature extractor to generate relevant support query features in metric learning.

In Fig. 2, when we use the traditional reciprocal points in our methodology, we see that *known-unknown* samples remain unscattered, forming a cluster like *known* classes and residing in very close vicinity of one of the *known* classes in metric space. It hampers the outlier detection capability and produces reduced OpenOA and AUROC values. Nevertheless, when we use prototype-based scattering loss, the *known-unknown* and pseudo-unknown data points are scattered uniformly over the metric space and eventually help in better outlier detection, thus boosting OpenOA and AUROC. Table 2 shows that our prototype-based Outlier Scattering Loss implementation gives a higher OpenOA and AUROC than the reciprocal loss. We gain 7.49%, 11.37%, 8.2%, 8.63% OpenOA, and 14%, 10.36%, 5.47%, 9.68% AUROC over the Indian Pines, University of Pavia, Salinas, and Houston-2013 datasets, respectively.

### 4. Experimental results on mini-imageNet

Even though MORGAN applies to generic image datasets, we evaluated it on the hyperspectral imaging (HSI) datasets, given their enormous real-life applications, costly annotations, and absence of a land-cover map for the entire globe. Nonetheless, the table below shows that MORGAN beats the existing methods convincingly on mini-Imagenet.

Table 3. 5-shot comparison on miniImageNet dataset

| Model         | mini-Imagenet (5-way) |       |          |       |
|---------------|-----------------------|-------|----------|-------|
|               | 1-shot                |       | 5-shot   |       |
|               | ClosedOA              | AUROC | ClosedOA | AUROC |
| OpenMax [1]   | 63.69                 | 62.64 | 80.56    | 62.2  |
| PEELER [6]    | 65.86                 | 60.57 | 80.61    | 67.35 |
| SnaTCHer [5]  | 67.60                 | 69.40 | 82.36    | 76.15 |
| OCN [8]       | 66.89                 | 69.73 | 82.33    | 74.97 |
| MORGAN [ours] | 69.22                 | 72.65 | 84.87    | 79.61 |

### 5. Consequence of noise variations

**Case-1**  $\sigma L < \sigma H$ : In the presence of moderate standard deviation  $\sigma = \sigma H - \sigma L$  of an isotropic Gaussian distribution in Fig. 3a, pseudo-fine-grained outliers are generated surrounding the closed boundary. Hence, we obtain good closedOA, openOA and AUROC results.

**Case-2**  $\sigma L \approx \sigma H$ : Many *pseudo-known* samples erroneously get recognized as outliers due to very low marginal separation  $\sigma = \sigma H - \sigma L$  for *pseudo-unknown* sample generation. It causes a reduced closedOA value. (Fig. 3b)

Table 4. 1, 5, 10, 15-shot FSOSR performance comparison of the proposed MORGAN over four benchmark hyperspectral datasets

| Shot    | Indian Pines |            |            | Pavia University |            |            | Salinas    |            |            | Houston-2013 |            |            |
|---------|--------------|------------|------------|------------------|------------|------------|------------|------------|------------|--------------|------------|------------|
|         | ClosedOA     | OpenOA     | AUROC      | ClosedOA         | OpenOA     | AUROC      | ClosedOA   | OpenOA     | AUROC      | ClosedOA     | OpenOA     | AUROC      |
| 1-shot  | 91.47±0.14   | 87.42±0.08 | 90.83±0.12 | 79.88±0.16       | 85.22±0.21 | 90.11±0.09 | 83.24±0.17 | 90.22±0.14 | 91.96±0.12 | 77.15±0.22   | 89.20±0.15 | 91.06±0.12 |
| 5-shot  | 95.09±0.18   | 90.43±0.24 | 95.59±0.12 | 81.11±0.19       | 92.18±0.18 | 92.98±0.14 | 86.64±0.09 | 93.70±0.11 | 94.99±0.11 | 83.64±0.21   | 92.18±0.14 | 95.17±0.16 |
| 10-shot | 96.12±0.26   | 92.37±0.27 | 96.21±0.15 | 84.05±0.25       | 93.65±0.23 | 93.71±0.33 | 88.39±0.21 | 94.52±0.35 | 95.77±0.21 | 85.85±0.27   | 93.72±0.31 | 95.88±0.19 |
| 15-shot | 96.95±0.22   | 93.45±0.19 | 96.84±0.19 | 86.53±0.17       | 95.10±0.12 | 94.11±0.21 | 90.25±0.12 | 95.96±0.15 | 96.29±0.15 | 87.96±0.37   | 94.51±0.19 | 95.99±0.17 |

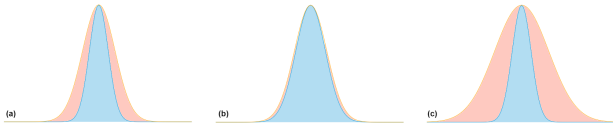

Figure 3. Effect of the noise variance on two generators responsible for generating *pseudo-known* and outlier samples, when (a)  $\sigma L < \sigma H$  (b)  $\sigma L \approx \sigma H$  (c)  $\sigma L \ll \sigma H$ . The blue region indicates the region for sampling a noise vector to generate a *pseudo-known* sample. Also, another noise vector is sampled from the surrounding orange zone to generate a *pseudo-unknown* sample.

**Case-3**  $\sigma L \ll \sigma H$ : Finally in Fig. 3(c) due to  $\sigma L \ll \sigma H$ , pseudo-outliers mix with other *known* class samples, reducing OpenOA.

## 6. Influence of incrementing support set size

In Table 4, we have shown the results of MORGAN by gradually incrementing the support set size with a value of 5. We can see that the overall MORGAN performance for the three evaluation metrics increases over all the four HSI datasets due to higher support set information about *known* classes. It increases closed-set data density by extracting relevant *known* support features and directly helps in boosting closedOA. Also, due to compact abating closed bound generation, fine-grained *pseudo-unknowns* and *known-unknowns* become better discriminable. Thus the openOA and AUROC also increase. For the Indian Pines dataset, ClosedOA and AUROC values almost got saturated from 10-shot to 15-shot with very high performance  $\approx 97\%$ . Similarly, we observe approximately 1.5% gain on all evaluation metrics over other datasets for 10-shots to 15-shots evaluation.

## 7. Effect of different loss components based on inner-loop optimization algorithm

Fig. 4 represents the loss curves due to the different combinations of objective functions in training the MORGAN feature extractor. In MORGAN, two generative networks generate the *pseudo-known* and *unknown* samples internally in an episode as per Algorithm 2, and they are optimized by either using MAML [4] or Reptile [7]. However, we observe that the optimization choice between MAML or Reptile for adversarial sample generation and augmentation with support and query features to enhance the open-closed

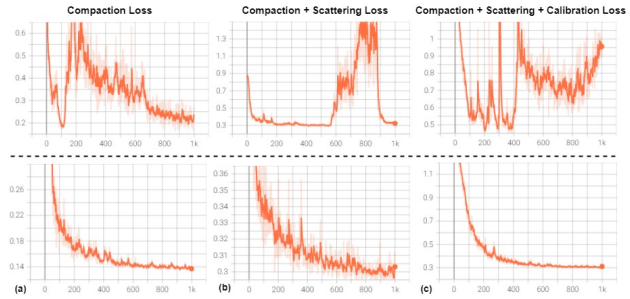

Figure 4. Feature extractor loss decay comparison for 5-shot FSOSR over Salinas dataset using MAML [4] (row 1) and Reptile [7] (row 2)-based pseudo feature generation, (a) only compaction loss decay b) optimization with compaction and scattering loss (c) three-fold loss optimization using compaction, scattering, and outlier calibration loss.

data density has a profound consequence in optimizing the feature extractor.

While we use only compaction loss to optimize the feature extractor, we see a sudden dip in the loss curve for the MAML based pseudo sample generation during the initial training epochs. Afterward, the loss increased and gradually converged to a higher value than the Reptile-based feature generation, which converged quite smoothly. The Reptile-based adversarial feature generation converged with slight fluctuations when we added scattering loss to the compaction loss. Whereas for MAML based generation, the loss suddenly increased sharply after 500 epochs, continues fluctuations, and then decays at 900 epochs. Finally, when we add the outlier loss to the compaction and scattering loss, we see a very smooth convergence with a minor fluctuation in Reptile based feature hallucination. Still, MAML continues suffering from highly oscillating loss decay.

Based on these observations, we can envisage that since the MAML is a second-order optimization technique, the model parameters fail to converge at a global optimum quickly and suffers from gradient explosion. The parameters mostly converge to saddle points in the loss plane, where slight perturbations to the model parameters cause fluctuations with high dip and rise. Sometimes, it fails to converge at all. On the other hand, Reptile based optimization helps update generative components quickly due to its first-order optimization. Interestingly, Reptile-produced pseudo-open samples lie closely in metric space to their *known* counterpart. Hence we observe smooth decay when augmenting pseudo features with support query features.

## 8. MORGAN model parameters

| Layer (type)                   | Output Shape            | Param # | Connected to                          |
|--------------------------------|-------------------------|---------|---------------------------------------|
| input_1 (InputLayer)           | [(None, 11, 11, 30, 3)] | 0       | []                                    |
| conv3d (Conv3D)                | (None, 11, 11, 30, 8)   | 224     | ['input_1[0][0]']                     |
| conv3d_2 (Conv3D)              | (None, 11, 11, 30, 8)   | 1736    | ['conv3d[0][0]']                      |
| cbam_3d_1 (CBAM_3D)            | (None, 11, 11, 30, 8)   | 729     | ['conv3d_2[0][0]']                    |
| conv3d_4 (Conv3D)              | (None, 11, 11, 30, 8)   | 1736    | ['cbam_3d_1[0][0]']                   |
| add (Add)                      | (None, 11, 11, 30, 8)   | 0       | ['conv3d[0][0]', 'conv3d_4[0][0]']    |
| max_pooling3d (MaxPooling3D)   | (None, 6, 6, 8, 8)      | 0       | ['add[0][0]']                         |
| conv3d_5 (Conv3D)              | (None, 6, 6, 8, 16)     | 3472    | ['max_pooling3d[0][0]']               |
| cbam_3d_2 (CBAM_3D)            | (None, 6, 6, 8, 16)     | 835     | ['conv3d_5[0][0]']                    |
| conv3d_7 (Conv3D)              | (None, 6, 6, 8, 16)     | 6928    | ['cbam_3d_2[0][0]']                   |
| cbam_3d_3 (CBAM_3D)            | (None, 6, 6, 8, 16)     | 835     | ['conv3d_7[0][0]']                    |
| conv3d_9 (Conv3D)              | (None, 6, 6, 8, 16)     | 6928    | ['cbam_3d_3[0][0]']                   |
| add_1 (Add)                    | (None, 6, 6, 8, 16)     | 0       | ['cbam_3d_2[0][0]', 'conv3d_9[0][0]'] |
| max_pooling3d_1 (MaxPooling3D) | (None, 3, 3, 4, 16)     | 0       | ['add_1[0][0]']                       |
| cbam_3d_4 (CBAM_3D)            | (None, 3, 3, 4, 16)     | 835     | ['max_pooling3d_1[0][0]']             |
| conv3d_11 (Conv3D)             | (None, 1, 1, 2, 32)     | 13856   | ['cbam_3d_4[0][0]']                   |
| flatten (Flatten)              | (None, 64)              | 0       | ['conv3d_11[0][0]']                   |

Total params: 38,114  
 Trainable params: 38,114  
 Non-trainable params: 0

Figure 5. The layer wise summary of the feature extractor  $f_\varphi$  following R3CBAM in OCN[8]

Model: "generator\_high"

| Layer (type)         | Output Shape | Param # |
|----------------------|--------------|---------|
| input_4 (InputLayer) | [(None, 24)] | 0       |
| dense_16 (Dense)     | (None, 32)   | 800     |
| dense_17 (Dense)     | (None, 48)   | 1584    |
| dense_18 (Dense)     | (None, 64)   | 3136    |

Total params: 5,520  
 Trainable params: 5,520  
 Non-trainable params: 0

Figure 6. The layer wise summary of  $G_{\mathcal{H}\theta}$

Model: "discriminator\_high"

| Layer (type)         | Output Shape | Param # |
|----------------------|--------------|---------|
| input_6 (InputLayer) | [(None, 80)] | 0       |
| dense_24 (Dense)     | (None, 48)   | 3888    |
| dense_25 (Dense)     | (None, 32)   | 1568    |
| dense_26 (Dense)     | (None, 16)   | 528     |
| dense_27 (Dense)     | (None, 8)    | 136     |
| dense_28 (Dense)     | (None, 1)    | 9       |

Total params: 6,129  
 Trainable params: 6,129  
 Non-trainable params: 0

Figure 7. The layer wise summary of  $D_{\mathcal{H}\phi}$

## References

[1] Abhijit Bendale and Terrance E Boult. Towards open set deep networks. In *Proceedings of the IEEE conference on computer vision and pattern recognition*, pages 1563–1572, 2016.

Model: "generator\_low"

| Layer (type)         | Output Shape | Param # |
|----------------------|--------------|---------|
| input_3 (InputLayer) | [(None, 24)] | 0       |
| dense_13 (Dense)     | (None, 32)   | 800     |
| dense_14 (Dense)     | (None, 48)   | 1584    |
| dense_15 (Dense)     | (None, 64)   | 3136    |

Total params: 5,520  
 Trainable params: 5,520  
 Non-trainable params: 0

Figure 8. The layer wise summary of  $G_{\mathcal{L}\theta}$

Model: "discriminator\_low"

| Layer (type)         | Output Shape | Param # |
|----------------------|--------------|---------|
| input_5 (InputLayer) | [(None, 80)] | 0       |
| dense_19 (Dense)     | (None, 48)   | 3888    |
| dense_20 (Dense)     | (None, 32)   | 1568    |
| dense_21 (Dense)     | (None, 16)   | 528     |
| dense_22 (Dense)     | (None, 8)    | 136     |
| dense_23 (Dense)     | (None, 1)    | 9       |

Total params: 6,129  
 Trainable params: 6,129  
 Non-trainable params: 0

Figure 9. The layer wise summary of  $D_{\mathcal{L}\phi}$

| Layer (type)         | Output Shape | Param # |
|----------------------|--------------|---------|
| input_2 (InputLayer) | [(None, 3)]  | 0       |
| dense_10 (Dense)     | (None, 16)   | 64      |
| dense_11 (Dense)     | (None, 8)    | 136     |
| dense_12 (Dense)     | (None, 2)    | 18      |

Total params: 218  
 Trainable params: 218  
 Non-trainable params: 0

Figure 10. The layer wise summary of  $\mathcal{O}_\varepsilon$

[2] Guangyao Chen, Peixi Peng, Xiangqian Wang, and Yonghong Tian. Adversarial reciprocal points learning for open set recognition. *arXiv preprint arXiv:2103.00953*, 2021.

[3] Guangyao Chen, Limeng Qiao, Yemin Shi, Peixi Peng, Jia Li, Tiejun Huang, Shiliang Pu, and Yonghong Tian. Learning open set network with discriminative reciprocal points. In *Computer Vision—ECCV 2020: 16th European Conference, Glasgow, UK, August 23–28, 2020, Proceedings, Part III 16*, pages 507–522. Springer, 2020.

[4] Chelsea Finn, Pieter Abbeel, and Sergey Levine. Model-agnostic meta-learning for fast adaptation of deep networks. In *International Conference on Machine Learning*, pages 1126–1135. PMLR, 2017.

[5] Minki Jeong, Seokeon Choi, and Changick Kim. Few-shot open-set recognition by transformation consistency. In *Proceedings of the IEEE/CVF Conference on Computer Vision and Pattern Recognition*, pages 12566–12575, 2021.

[6] Bo Liu, Hao Kang, Haoxiang Li, Gang Hua, and Nuno Vasconcelos. Few-shot open-set recognition using meta-learning. In *Proceedings of the IEEE/CVF Conference on Computer Vision and Pattern Recognition*, pages 8798–8807, 2020.

[7] Alex Nichol, Joshua Achiam, and John Schulman. On first-order meta-learning algorithms. *arXiv preprint arXiv:1803.02999*, 2018.

[8] Debabrata Pal, Valay Bundeale, Renuka Sharma, Biplab Banerjee, and Yogananda Jeppu. Few-shot open-set recognition of hyperspectral images with outlier calibration network. In *Proceedings of the IEEE/CVF Winter Conference on Applications of Computer Vision (WACV)*, pages 3801–3810, January 2022.
